# Supplementary material for: Fine-scale fluctuations of PM 1 , PM 2.5 , PM 10 and SO 2 concentrations caused by a prolonged volcanic eruption (Fagradalsfjall 2021, Iceland)
Source: Copernicus journal article supplement (doi:10.5194/egusphere-2025-937), 2025-03-27
Supplement: Supplementary file 1 [file egusphere-2025-937-supplement.zip]

## Sheet: SuppTable1
	Table S1. Information about instrumentation, data completeness, data exclusion, etc, for each SO2 and PM monitoring station. Summary statistics for SO2 (hourly-means), PM10, PM2.5 and PM1 (daily-means) data during the background and eruption periods. SO2 concentration data (ug/m3) reported to 2 s.f. Full raw dataset openly available for download from Environment Agency of Iceland https://loftgaed…
	NM = pollutant not measured at the respective station
	NaN = data missing or excluded from this analysis (see relevant column for exclusion reason)
	* in this study, SO2 data were analysed back to 01/01/2020. Stations which have measured SO2 since before this date are labelled as "pre-2020" in column labelled "SO2 data available from". The exact measurement start dates are not specified for these stations, as data collected before 2020 are outside the remit of this study
	** for definitions of background periods for SO2 and PM, respectively see Methods
	*** due to the relatively low accuracy of the eruption-response G1 stations, SO2 data were only analysed for number of exceedance events and not for quantitative concentrations. See Methods for more details
			SO2 Data availability				SO2 Data processing			SO2 hourly-means. Summary statististics							PM10, PM2.5, PM1 Data availability							PM10, PM2.5, PM1 Data reduction											PM10 daily-means. Summary statististics							PM2.5 daily-means. Summary statististics							PM1 daily-means. Summary statististics
Area	ID	Full name	SO2 instrument	Lower detection limit (ug/m3)	Resolution (ug/m3)	*SO2 data available from (YYYY-MM-DD)	**SO2 background data completeness (%)	SO2 eruption data completeness (%)	Included in SO2 analysis (Y/N)	SO2 background average (ug/m3)	SO2 eruption average (ug/m3)	SO2 eruption and background average t-test p-value (p<0.05 = significant difference)	SO2 max concentration background (ug/m3)	SO2 max concentration eruption (ug/m3)	SO2 number of exceedance events > 350 ug/m3 background	SO2 number of exceedance events > 350 ug/m3 eruption	PM instrument	Lower detection limit (ug/m3)	Resolution (ug/m3)	PM size fractions	PM10 data available from	PM2.5 data available from	PM1 data available from	**n of analysed PM10 background periods	**n of analysed PM2.5 background periods	**n of analysed PM1 background periods	**PM10 background data completeness (%)	PM10 eruption data completeness (%)	**PM2.5 background data completeness (%)	PM2.5 eruption data completeness (%)	**PM1 background data completeness (%)	PM1 eruption data completeness (%)	Included in PM analysis (Y/N)	Reason if PM excluded from analysis	PM10 background average (ug/m3)	PM10 eruption average (ug/m3)	PM10 eruption and background average t-test p-value (p<0.05 = significant difference)	PM10 max concentration background (ug/m3)	PM10 max concentration eruption (ug/m3)	PM10 number of exceedance events > 50 ug/m3 background	PM10 number of exceedance events > 50 ug/m3 eruption	PM2.5 background average (ug/m3)	PM2.5 eruption average (ug/m3)	PM2.5 eruption and background average t-test p-value (p<0.05 = significant difference)	PM2.5 max concentration background (ug/m3)	PM2.5 max concentration eruption (ug/m3)	PM2.5 number of exceedance events > 15 ug/m3 background	PM2.5 number of exceedance events > 15 ug/m3 eruption	PM1 background average (ug/m3)
Eruption site	G1-A	Geldr01	Crowcon Xgard	3	3	2021-04-03	0	83	Y***	NaN	830	NaN	NaN	18000	NaN	1600	NM	NM	NM	NM	NM	NM	NM	NM	NM	NM	NM	NM	NM	NM	NM	NM	NM	NM	NM	NM	NM	NM	NM	NM	NM	NM	NM	NM	NM	NM	NM	NM	NM
Eruption site	G1-B	Geldr02/Moda5	Crowcon Xgard (until 2021-06-03) // Alphasense SO2-B4 (from 2021-06-03)	3 // 13	3 // 13	2021-04-06	0	80	Y***	NaN	9.1	NaN	NaN	2300	NaN	16	NM	NM	NM	NM	NM	NM	NM	NM	NM	NM	NM	NM	NM	NM	NM	NM	NM	NM	NM	NM	NM	NM	NM	NM	NM	NM	NM	NM	NM	NM	NM	NM	NM
Eruption site	G1-C	Moda6	Alphasense SO2-B4	13	13	2021-06-02	0	56	Y***	NaN	49	NaN	NaN	3100	NaN	110	NM	NM	NM	NM	NM	NM	NM	NM	NM	NM	NM	NM	NM	NM	NM	NM	NM	NM	NM	NM	NM	NM	NM	NM	NM	NM	NM	NM	NM	NM	NM	NM	NM
Eruption site	G1-D	Moda4	Alphasense SO2-B4	13	13	2021-06-02	0	55	Y***	NaN	14	NaN	NaN	1200	NaN	20	NM	NM	NM	NM	NM	NM	NM	NM	NM	NM	NM	NM	NM	NM	NM	NM	NM	NM	NM	NM	NM	NM	NM	NM	NM	NM	NM	NM	NM	NM	NM	NM	NM
Eruption site	G1-E	Moda2	Alphasense SO2-B4	13	13	2021-06-03	0	55	Y***	NaN	5.2	NaN	NaN	180	NaN	0	NM	NM	NM	NM	NM	NM	NM	NM	NM	NM	NM	NM	NM	NM	NM	NM	NM	NM	NM	NM	NM	NM	NM	NM	NM	NM	NM	NM	NM	NM	NM	NM	NM
Reykjanes peninsula	G2-A	Grindavík, Nesvegur	Horiba APSA 370	1	1	2020-01-29	59	100	Y	0.12	1.8	7e-27	6.6	440	NaN	1	NM	NM	NM	NM	NM	NM	NM	NM	NM	NM	NM	NM	NM	NM	NM	NM	NM	NM	NM	NM	NM	NM	NM	NM	NM	NM	NM	NM	NM	NM	NM	NM	NM
Reykjanes peninsula	G2-B	Hafnir	Horiba APSA 370	1	1	2021-04-16	0	84	Y	NaN	0.25	NaN	NaN	49	NaN	0	NM	NM	NM	NM	NM	NM	NM	NM	NM	NM	NM	NM	NM	NM	NM	NM	NM	NM	NM	NM	NM	NM	NM	NM	NM	NM	NM	NM	NM	NM	NM	NM	NM
Reykjanes peninsula	G2-C	Ásbrú, Háaleitisskóli	Horiba APSA 370	1	1	2021-04-29	0	78	Y	NaN	4.1	NaN	NaN	870	NaN	6	NM	NM	NM	NM	NM	NM	NM	NM	NM	NM	NM	NM	NM	NM	NM	NM	NM	NM	NM	NM	NM	NM	NM	NM	NM	NM	NM	NM	NM	NM	NM	NM	NM
Reykjanes peninsula	G2-D	Keflavík, Myllubakkaskóli	Horiba APSA 370	1	1	2021-05-07	0	64	Y	NaN	3	NaN	NaN	600	NaN	2	NM	NM	NM	NM	NM	NM	NM	NM	NM	NM	NM	NM	NM	NM	NM	NM	NM	NM	NM	NM	NM	NM	NM	NM	NM	NM	NM	NM	NM	NM	NM	NM	NM
Reykjanes peninsula	G2-E	Njarðvík, Lerkidalur	Thermo, Model 450i	3	1	2021-03-26	0	96	Y	NaN	8.4	NaN	NaN	1100	NaN	25	NM	NM	NM	NM	NM	NM	NM	NM	NM	NM	NM	NM	NM	NM	NM	NM	NM	NM	NM	NM	NM	NM	NM	NM	NM	NM	NM	NM	NM	NM	NM	NM	NM
Reykjanes peninsula	G2-F	Vogar	Thermo, Model 450i	3	1	2021-03-03	4.4	97	Y	0.15	10	4.5e-16	7.7	2400	NaN	31	NM	NM	NM	NM	NM	NM	NM	NM	NM	NM	NM	NM	NM	NM	NM	NM	NM	NM	NM	NM	NM	NM	NM	NM	NM	NM	NM	NM	NM	NM	NM	NM	NM
Reykjavík capital area	G3-A	Reykjavík, Bústaðavegur / Háaleitisbraut	Recordum, Airpointer	1	0.7	pre-2020	100	99	Y	0.091	2.2	1.6e-35	14	250	0	0	PALAS, Model Fidas 200 S	0	0.1	PM10, PM2.5, PM1	2020-03-01	2020-03-19	2020-03-19	2	2	2	100	100	100	100	100	100	Y		10	13	0.0048	75	130	1.5	5	3.4	5	9.2e-07	19	33	1.5	5	1.5
Reykjavík capital area	G3-B	Hafnarfjörður, Hvaleyrarholt	Thermo, Model 450i	3	1	pre-2020	100	98	Y	0.53	3.5	6.2e-20	57	520	0	5	Thermo, Model 5030 Sharp	4	0.1	PM10, PM2.5	2009-01-01	2009-01-01	NM	9	9	NM	91	15	91	15	NM	NM	N	Eruption data completeness < 30%	7.5	8	0.55	110	21	0.89	NM	2	3.4	0.052	61	10	1.6	NM	NM
Reykjavík capital area	G3-C	Hafnarfjörður, Norðurhella	Thermo, Model 450i	3	1	pre-2020	99	100	Y	0.7	3	2e-22	50	360	0	1	Thermo, Model 5030 Sharp	4	0.1	PM10, PM2.5	2016-05-12	2016-05-12	NM	5	5	NM	37	0	37	0	NM	NM	N	Eruption period not available	6.4	NaN	NaN	43	NaN	NM	NM	NM	NM	NaN	36	NaN	2.6	NM	NM
Reykjavík capital area	G3-D	Kópavogur, Dalsmári	Thermo, Model 450i	3	1	pre-2020	100	100	Y	0.15	3.6	8e-26	24	490	0	5	PALAS, Model Fidas 200 S	0	0.1	PM10, PM2.5, PM1	2014-05-30	2014-05-30	2020-11-06	7	7	1	57	88	57	88	11	100	Y		10	13	0.032	84	140	0.43	4	6.2	5.8	0.42	40	36	6	7	1.4
Reykjavík capital area	G3-E	Reykjavík, Grensásvegur	Thermo Model 450iQ	3	3	pre-2020	100	100	Y	0.13	4.7	4.1e-39	10	480	0	5	Met One, Model BAM 1020	4.8	0.24	PM10, PM2.5	2003-01-01	2003-01-01	NM	8	8	NM	66	91	66	91	NM	NM	Y		16	14	0.088	170	88	2.9	5	8.5	7.5	0.19	87	48	15	22	NM
Reykjavík capital area	G3-F	Reykjavík, Norðlingaholt	Thermo, Model 450i	3	1	2021-03-20	0	99	Y	NaN	7.3	NaN	NaN	750	NaN	9	NM	NM	NM	NM	NM	NM	NM	NM	NM	NM	NM	NM	NM	NM	NM	NM	NM	NM	NM	NM	NM	NM	NM	NM	NM	NM	NM	NM	NM	NM	NM	NM	NM
Reykjavík capital area	G3-G	Reykjavík, Vesturbæjarlaug	NM	NM	NM	NM	0	0	NM	NM	NM	NM	NM	NM	NM	NM	PALAS, Model Fidas 200 S	0	0.1	PM10, PM2.5, PM1	2020-09-17	2020-09-17	2020-09-17	1	1	1	100	95	100	95	100	95	Y		9.3	12	0.054	68	110	1	4	3.1	4.8	7.5e-07	18	29	1	5	1.3
Reykjavík capital area	G3-H	Reykjavík, Húsdýragarðurinn	NM	NM	NM	NM	0	0	NM	NM	NM	NM	NM	NM	NM	NM	Thermo, Model 5030 Sharp	4	0.1	PM10, PM2.5	2006-01-01	2006-01-01	NM	12	12	NM	60	80	60	0	NM	NM	Y	Only PM10 included, eruption period not available for PM2.5	18	16	0.047	160	110	1.9	4	NM	NM	NaN	82	NaN	NM	NM	NM
Southwest Iceland	G4-A	Hveragerði, Finnmörk	Thermo, Model 450i	3	1	2021-03-20	0	99	Y	NaN	5.5	NaN	NaN	720	NaN	3	NM	NM	NM	NM	NM	NM	NM	NM	NM	NM	NM	NM	NM	NM	NM	NM	NM	NM	NM	NM	NM	NM	NM	NM	NM	NM	NM	NM	NM	NM	NM	NM	NM
Southwest Iceland	G4-B	Hellisheiðarvirkjun	Thermo, Model 450i	3	1	2021-03-20	0	99	Y	NaN	6.7	NaN	NaN	2400	NaN	18	NM	NM	NM	NM	NM	NM	NM	NM	NM	NM	NM	NM	NM	NM	NM	NM	NM	NM	NM	NM	NM	NM	NM	NM	NM	NM	NM	NM	NM	NM	NM	NM	NM
Hvalfjörður	G5-A	Hvalfjörður, Gröf	Thermo, Model 450i	3	1	pre-2020	98	100	Y	3.2	5.1	4e-07	210	860	0	6	Thermo, Model 5030 Sharp	4	0.1	PM10, PM2.5	2014-02-12	2014-02-12	NM	6	6	0	93	91	93	91	NM	NM	Y		5.5	6.7	0.065	41	59	0	2	1.7	2.9	0.0025	20	25	1	8	NM
Hvalfjörður	G5-B	Hvalfjörður, Kríuvarða	Thermo, Model 450i	3	1	pre-2020	100	98	Y	7.2	15	3.9e-35	210	580	0	6	Thermo, Model 5030 Sharp	4	0.1	PM10, PM2.5	2010-04-15	2010-04-15	NM	8	8	0	67	57	67	57	NM	NM	Y		5.8	8.4	0.00087	58	55	0.25	1	2.4	5.4	1.2e-06	34	31	0.75	6	NM
Hvalfjörður	G5-C	Hvalfjörður, Melahverfi	Thermo, Model 450i	3	1	pre-2020	99	98	Y	1.1	4.5	8.4e-34	49	430	0	2	NM	NM	NM	NM	NM	NM	NM	NM	NM	NM	NM	NM	NM	NM	NM	NM	NM	NM	NM	NM	NM	NM	NM	NM	NM	NM	NM	NM	NM	NM	NM	NM	NM
North Iceland	G6-A	Akureyri, Strandgata	Recordum, Airpointer	1	0.7	pre-2020	95	100	Y	0.92	3.7	7.3e-87	9.1	250	0	0	Met One, Model BAM 1020	4.8	0.24	PM10	2018-02-15	NM	NM	3	NM	NM	95	99	NM	NM	NM	NM	Y		13	15	0.05	100	79	7.7	7	NM	NM	NM	NM	NM	NM	NM	NM
North Iceland	G6-B	Húsavík, Húsavíkurleiti	Teledyne Model T100	10	0.5	pre-2020	68	93	Y	0.018	0.53	2e-22	16	48	0	0	Met One Model BAM 1020	4.8	0.24	PM10, PM2.5	2016-11-08	2016-11-08	NM	4	4	NM	91	97	91	97	NM	NM	Y		4.9	6.7	0.016	45	67	0	2	0.63	0.6	0.87	13	16	0	1	NM
North Iceland	G6-C	Húsavík, Héðinsvík	Teledyne Model T100	10	0.5	pre-2020	99	100	Y	0.2	0.88	4e-21	62	60	0	0	Met One Model BAM 1020	4.8	0.24	PM10, PM2.5	2016-12-01	2016-12-01	NM	4	4	NM	84	85	84	85	NM	NM	Y		6.4	4	1.9e-05	43	33	0	0	0.42	0.84	0.038	11	12	0	NM	NM
East Iceland	G7-A	Reyðarfjörður, Hjallaeyra	Thermo, Model 43i	1	1	pre-2020	100	100	Y	1.8	2.4	5.6e-10	65	79	0	0	NM	NM	NM	NM	NM	NM	NM	NM	NM	NM	NM	NM	NM	NM	NM	NM	NM	NM	NM	NM	NM	NM	NM	NM	NM	NM	NM	NM	NM	NM	NM	NM	NM
East Iceland	G7-B	Reyðarfjörður, Hólmar	Thermo, Model 43i	1	1	2020-03-27	88	71	Y	1.5	1.7	0.02	55	58	0	0	NM	NM	NM	NM	NM	NM	NM	NM	NM	NM	NM	NM	NM	NM	NM	NM	NM	NM	NM	NM	NM	NM	NM	NM	NM	NM	NM	NM	NM	NM	NM	NM	NM
East Iceland	G7-C	Reyðarfjörður, Ljósá	Thermo, Model 43i	1	1	pre-2020	100	100	Y	2.8	4.1	1.9e-25	69	73	0	0	NM	NM	NM	NM	NM	NM	NM	NM	NM	NM	NM	NM	NM	NM	NM	NM	NM	NM	NM	NM	NM	NM	NM	NM	NM	NM	NM	NM	NM	NM	NM	NM	NM
East Iceland	G7-D	Reyðarfjörður, Miðstrandareyri	Thermo, Model 43i	1	1	pre-2020	74	63	Y	1.2	1.4	0.068	69	57	0	0	NM	NM	NM	NM	NM	NM	NM	NM	NM	NM	NM	NM	NM	NM	NM	NM	NM	NM	NM	NM	NM	NM	NM	NM	NM	NM	NM	NM	NM	NM	NM	NM	NM
[truncated: 7 more columns]
